# Supplementary material for: Prospective and detailed behavioral phenotyping in DDX3X syndrome
Source: Springer Nature journal article supplement (doi:10.1186/s13229-021-00431-z), 2021-05-16
Supplement: MOESM2 [file 19166622]

# S1: Behavioral Comorbidities

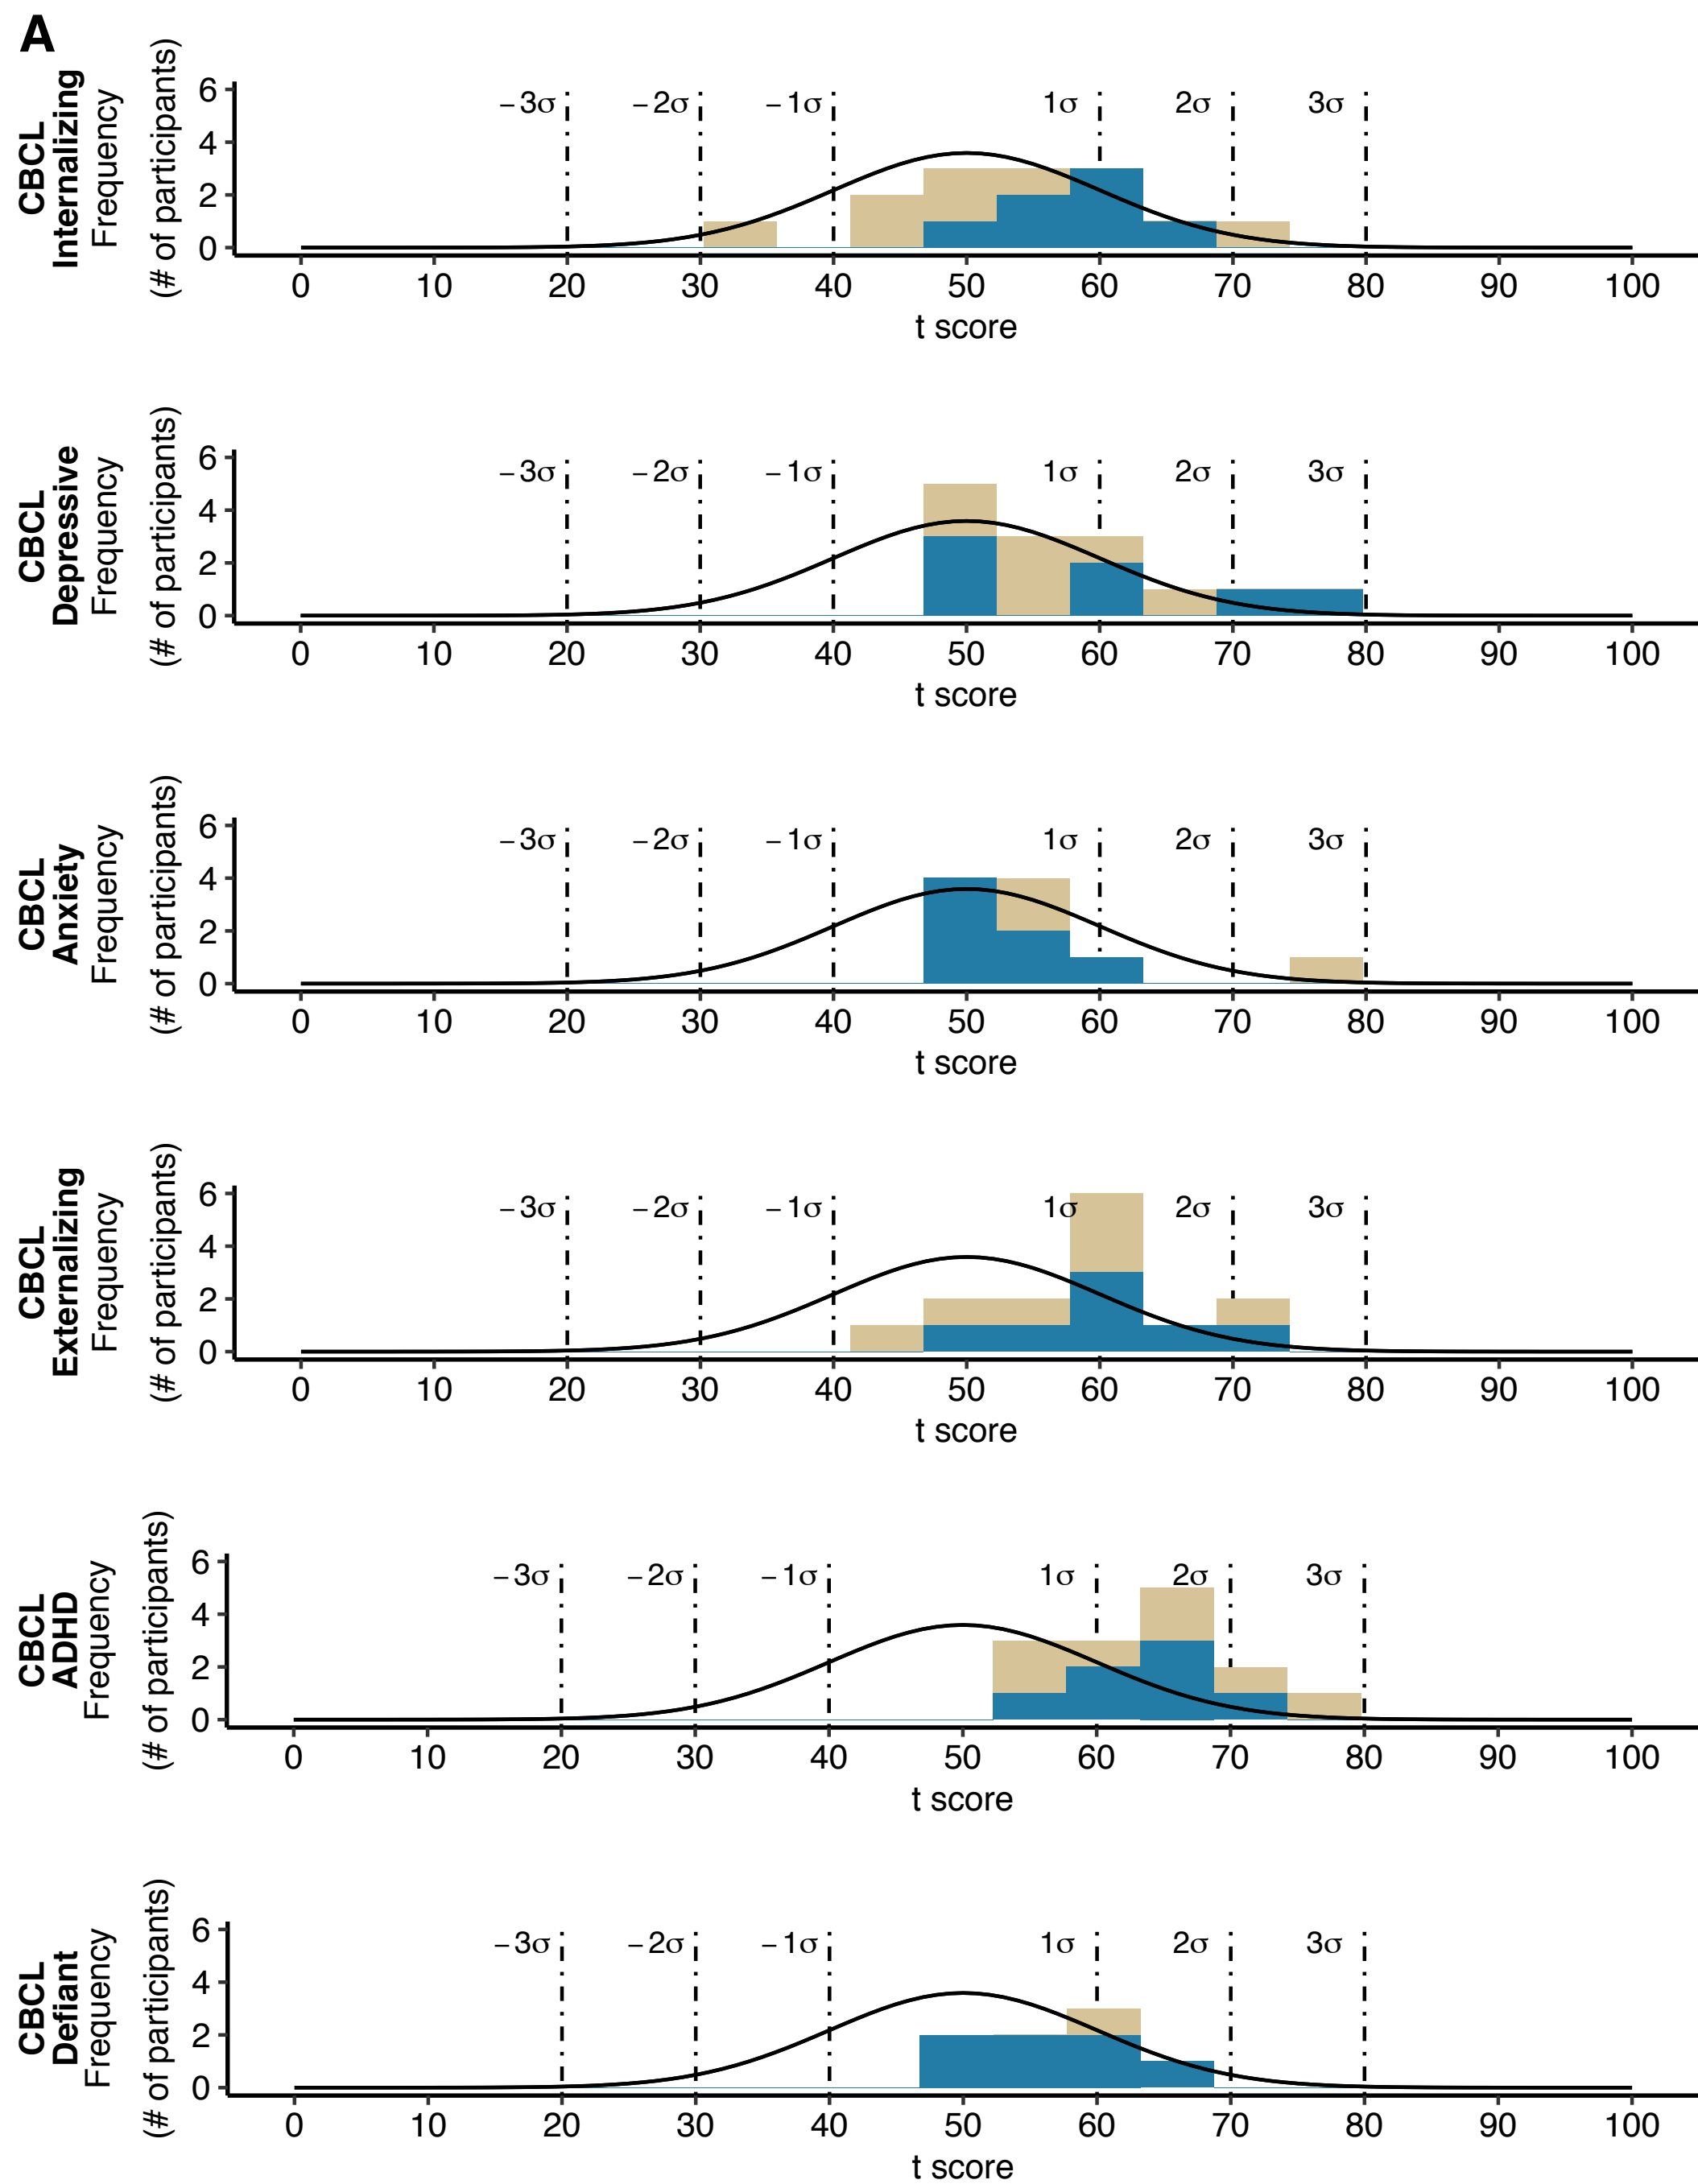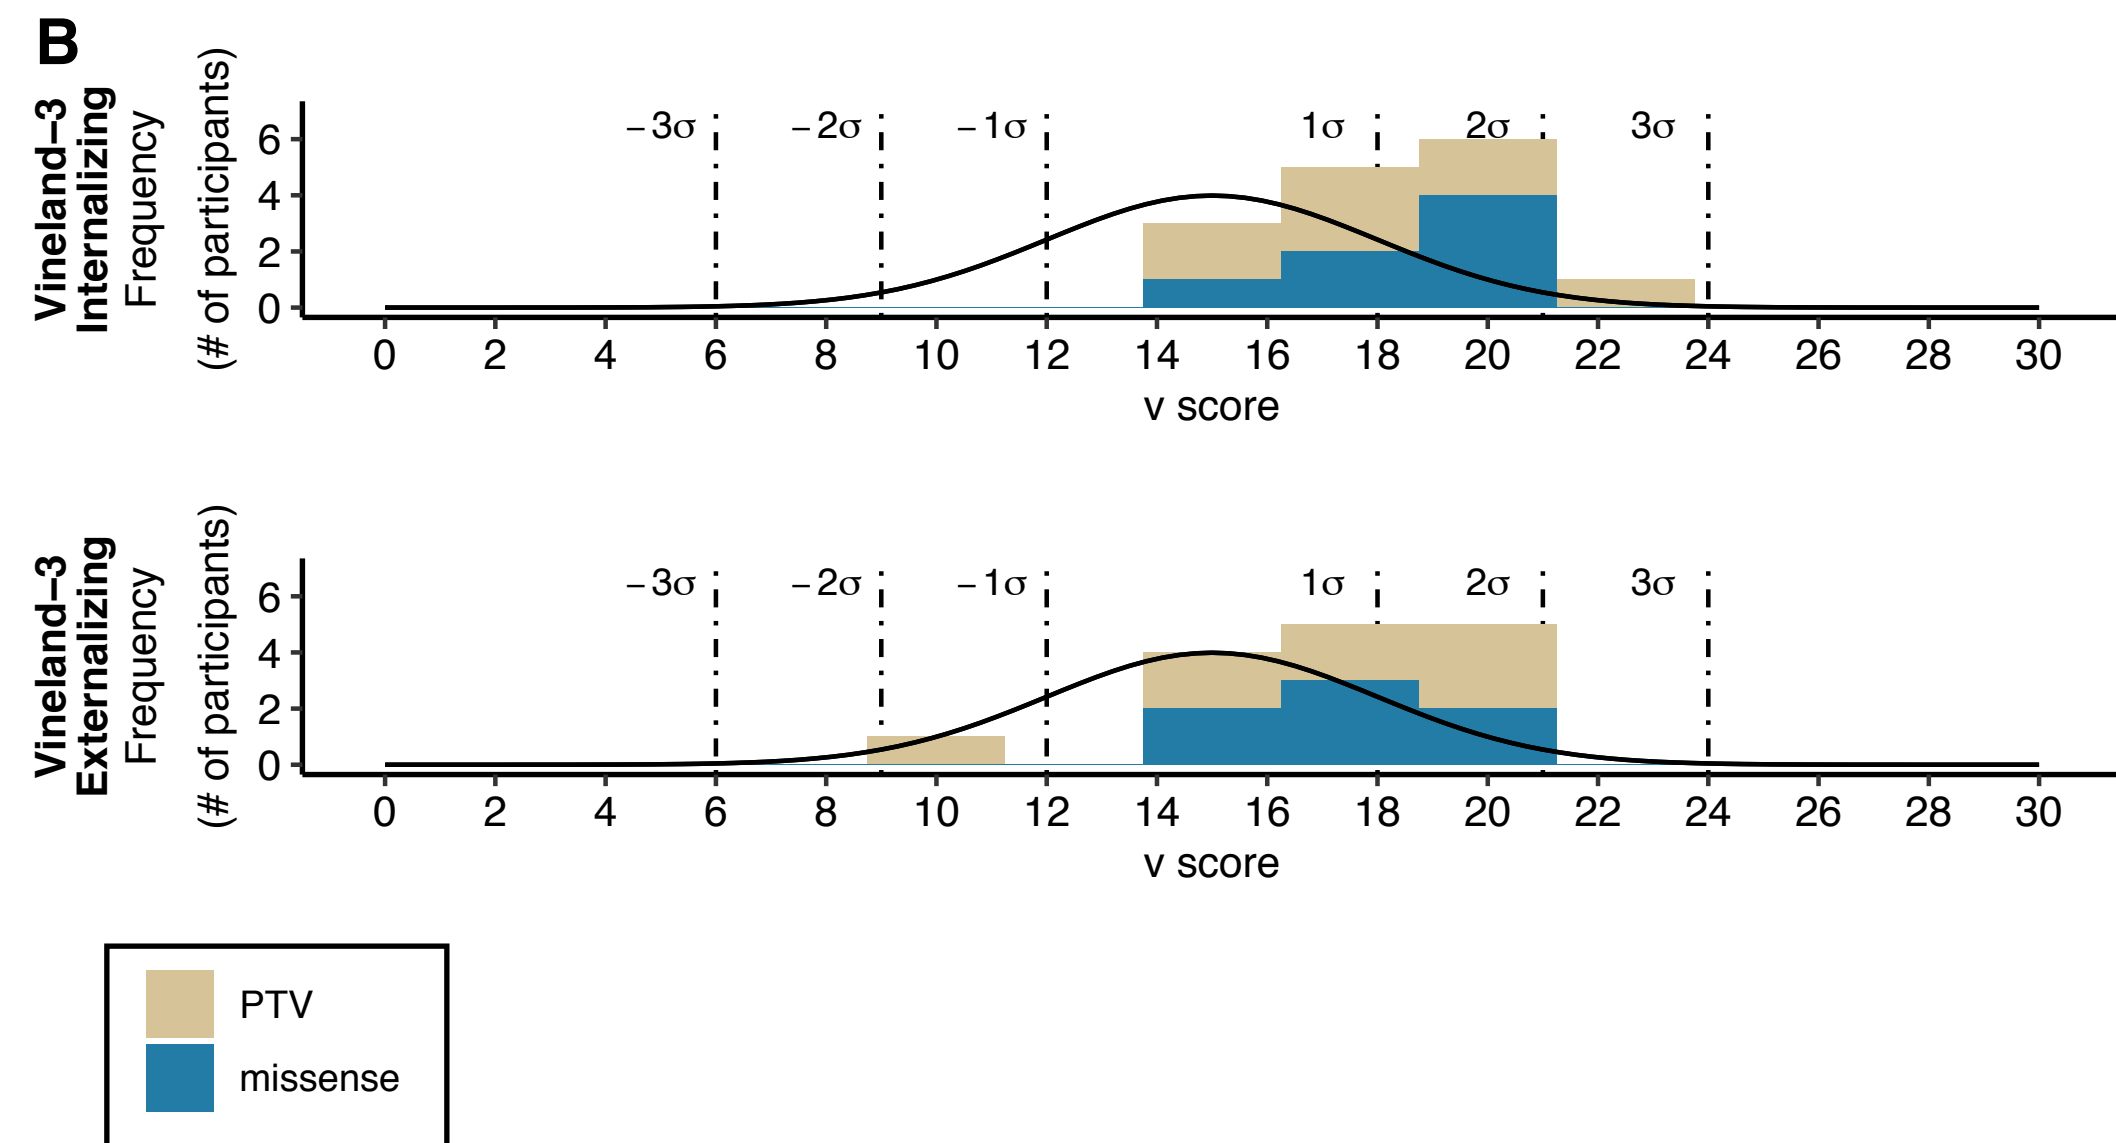

Figure S1. Behavioral comorbidities. A. Frequency histograms for the Child Behavior Checklist (CBCL) Internalizing and Externalizing composite scales, Depressive and Anxiety scales, and Attention-Deficit/Hyperactivity and Defiant DSM-oriented scales for ADHD and oppositional defiant disorder. T-scores have a mean of 50 and standard deviation of 10. B. Frequency histograms for the Vineland-3 Internalizing and Externalizing scales. V scores have a mean of 15 and standard deviation of 3. In all plots, higher scores indicate greater deficits. In panels A & B, distribution of standard scores in typically developing individuals are shown as black lines, together with associated standard deviations (dashed lines). PTV, protein truncating variant; missense, missense variants or in-frame deletions.
